# Supplementary material for: Different sensing modes of fluoride and acetate based on a calix[4]arene with 25,27-bistriazolylmethylpyrenylacetamides
Source: Royal Society of Chemistry journal article supplement (doi:10.1039/c3pp50175b), 2013-12-06
Supplement: c3pp50175b.pdf [file c3pp50175b.pdf]

## Electronic Supplementary Information

### Different sensing modes of fluoride and acetate based on a calix[4]arene with 25,27-bistriazolylmethylpyrenylacetamides

Hao-Chih Hung,<sup>a</sup> Yung-Yu Chang,<sup>a</sup> Liyang Luo,<sup>a, b</sup> Chen-Hsiung Hung,<sup>b</sup>  
Eric Wei-Guang Diao,<sup>a, \*</sup> and Wen-Sheng Chung<sup>a, \*</sup>

<sup>a</sup>Department of Applied Chemistry, National Chiao-Tung University, Hsinchu,  
30050, Taiwan, Republic of China

<sup>b</sup>Institute of Chemistry, Academia Sinica, Nankang, Taipei 105, Taiwan, Republic of China.

[diao@mail.nctu.edu.tw](mailto:diao@mail.nctu.edu.tw), [wschung@cc.nctu.edu.tw](mailto:wschung@cc.nctu.edu.tw)

| Figure No                   | Contents                                                                                                                                                                                        | Page |
|-----------------------------|-------------------------------------------------------------------------------------------------------------------------------------------------------------------------------------------------|------|
| <b>Figures S1 &amp; S2.</b> | <sup>1</sup> H and <sup>13</sup> C NMR spectra of compound <b>4</b> .                                                                                                                           | S2   |
| <b>Figure S3.</b>           | UV/vis and Fluorescence titration spectra ( $\lambda_{\text{ex}} = 326$ nm) of <b>4</b> (10 $\mu\text{M}$ ) with various amount of HO <sup>-</sup> in CH <sub>3</sub> CN at 298 K.              | S3   |
| <b>Figures S4 &amp; S5.</b> | <sup>1</sup> H and <sup>13</sup> C NMR spectra of compound <b>6</b> .                                                                                                                           | S4   |
| <b>Figure S6.</b>           | UV/vis and Fluorescence titration spectra ( $\lambda_{\text{ex}} = 326$ nm) of <b>6</b> (10 $\mu\text{M}$ ) with various amount of OH <sup>-</sup> in CH <sub>3</sub> CN at 298 K.              | S5   |
| <b>Figure S7.</b>           | Fluorescence titration spectra ( $\lambda_{\text{ex}} = 326$ nm) of <b>6</b> (a) 1 $\mu\text{M}$ and (b) 10 $\mu\text{M}$ with various amount of F <sup>-</sup> in CH <sub>3</sub> CN at 298 K. | S5   |
| <b>Figure S8.</b>           | The oscillator strengths of neutral (black square) and anion (red circle) species of <b>6</b> predicted using TTDFT method at the B3LYP/6-31G(d) level.                                         | S6   |
| <b>Figure S9–S10.</b>       | The molecular orbital of neutral- <b>6</b> under B3LYP/6-31G* calculation.                                                                                                                      | S7   |
| <b>Figure S11.</b>          | <sup>1</sup> H NMR titration spectra of <b>4</b> upon addition of various amount of F <sup>-</sup> in CD <sub>3</sub> CN at 298 K                                                               | S8   |
| <b>Figure S12.</b>          | <sup>1</sup> H NMR titration spectra of <b>4</b> upon addition of various amount of H <sub>2</sub> PO <sub>4</sub> <sup>-</sup> in CD <sub>3</sub> CN at 298 K                                  | S9   |
| <b>Figure S13.</b>          | <sup>1</sup> H NMR titration spectra of <b>4</b> upon addition of various amount of AcO <sup>-</sup> in CD <sub>3</sub> CN at 298 K                                                             | S10  |
| <b>Figure S14.</b>          | <sup>1</sup> H NMR titration spectra of <b>6</b> upon addition of various amount of F <sup>-</sup> in CD <sub>3</sub> CN at 298 K                                                               | S11  |



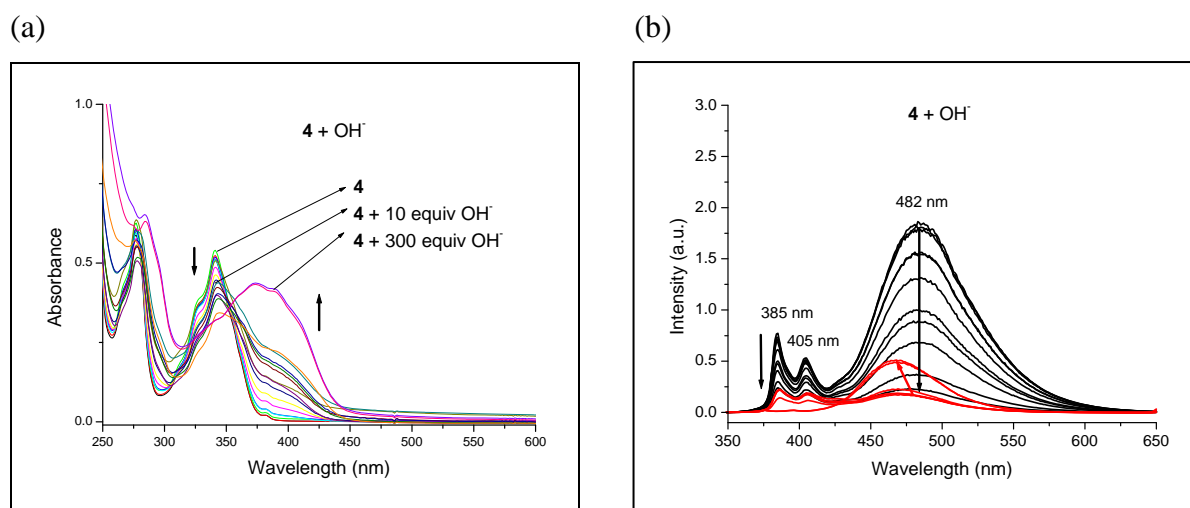

**Figure S3.** (a) UV/vis and (b) Fluorescence titration spectra ( $\lambda_{\text{ex}} = 326 \text{ nm}$ ) of **4** ( $10 \mu\text{M}$ ) with various amount of  $\text{OH}^-$  in  $\text{CH}_3\text{CN}$  at 298 K.

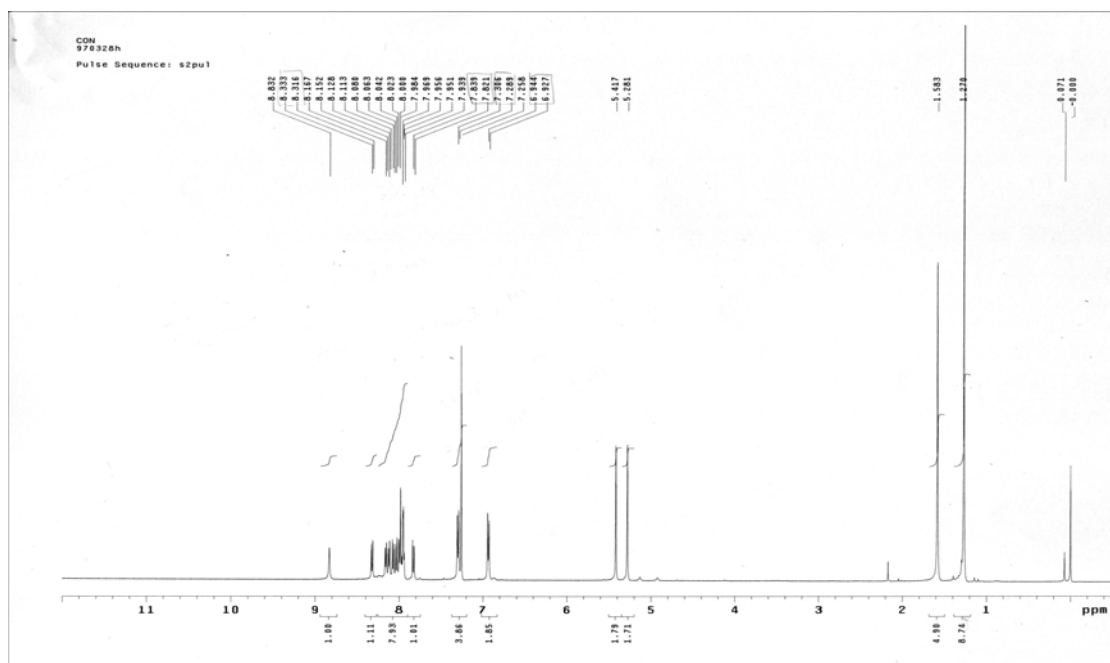

**Figure S4.**  $^1\text{H}$  NMR ( $\text{CDCl}_3$ , 500 MHz) spectrum of 2-{4'-[(4''-tert-butylphenoxy)-methyl]-1*H*-[1',2',3']-1-triazolyl}-*N*-(1-pyrenyl)-acetamide **6**.

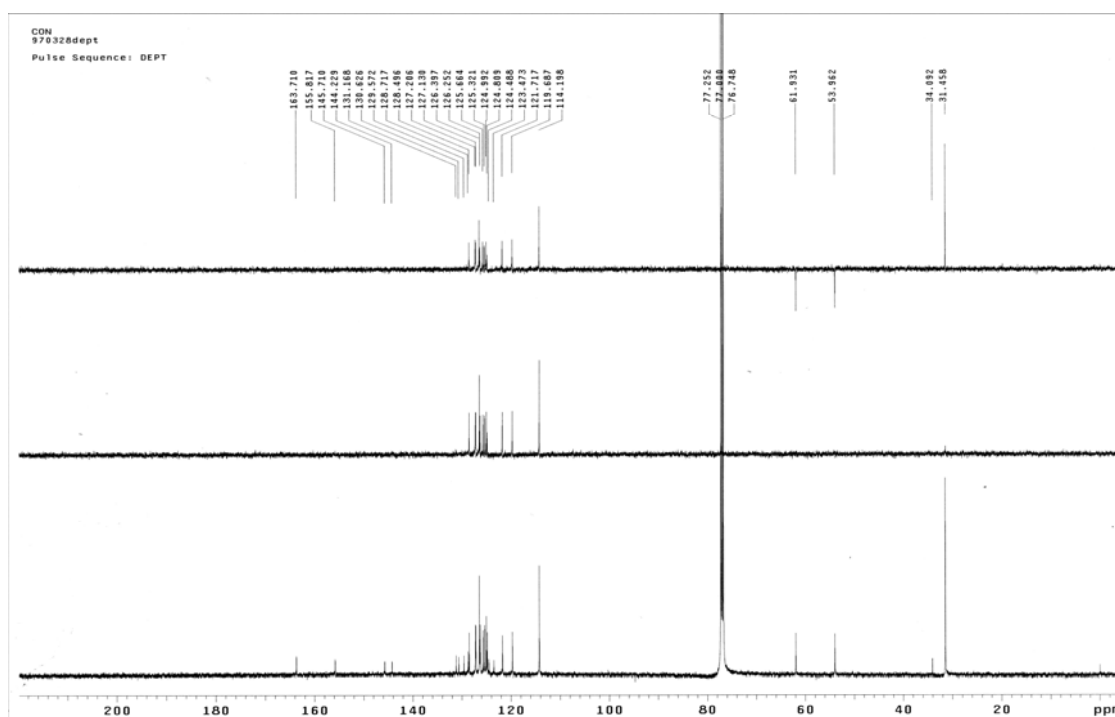

**Figure S5.**  $^{13}\text{C}$  NMR ( $\text{CDCl}_3$ , 125 MHz) spectrum of 2-{4'-[(4''-tert-butylphenoxy)-methyl]-1*H*-[1',2',3']-1-triazolyl}-*N*-(1-pyrenyl)-acetamide **6**.

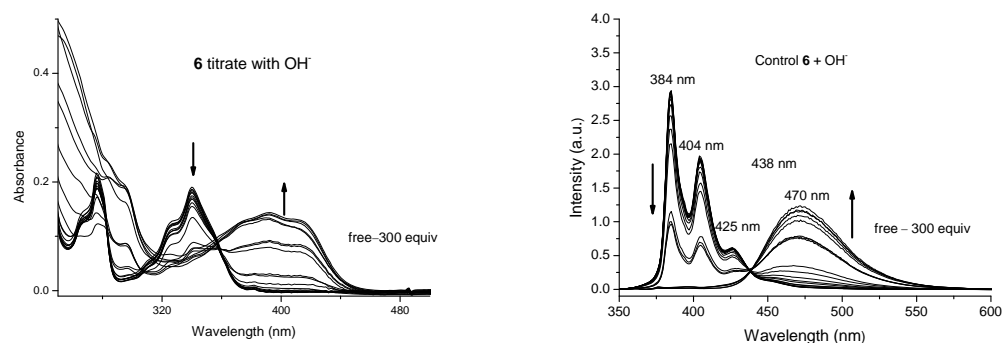

**Figure S6.** (a) UV/vis and (b) Fluorescence titration spectra ( $\lambda_{\text{ex}} = 326 \text{ nm}$ ) of **6** (10  $\mu\text{M}$ ) with various amount of OH<sup>-</sup> in CH<sub>3</sub>CN at 298 K.

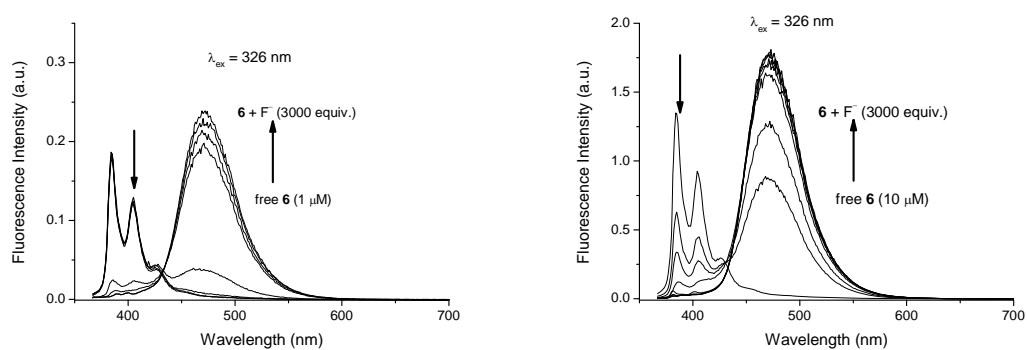

**Figure S7.** Fluorescence titration spectra ( $\lambda_{\text{ex}} = 326 \text{ nm}$ ) of **6** (a) 1  $\mu\text{M}$  and (b) 10  $\mu\text{M}$  with various amount of F<sup>-</sup> in CH<sub>3</sub>CN at 298 K.

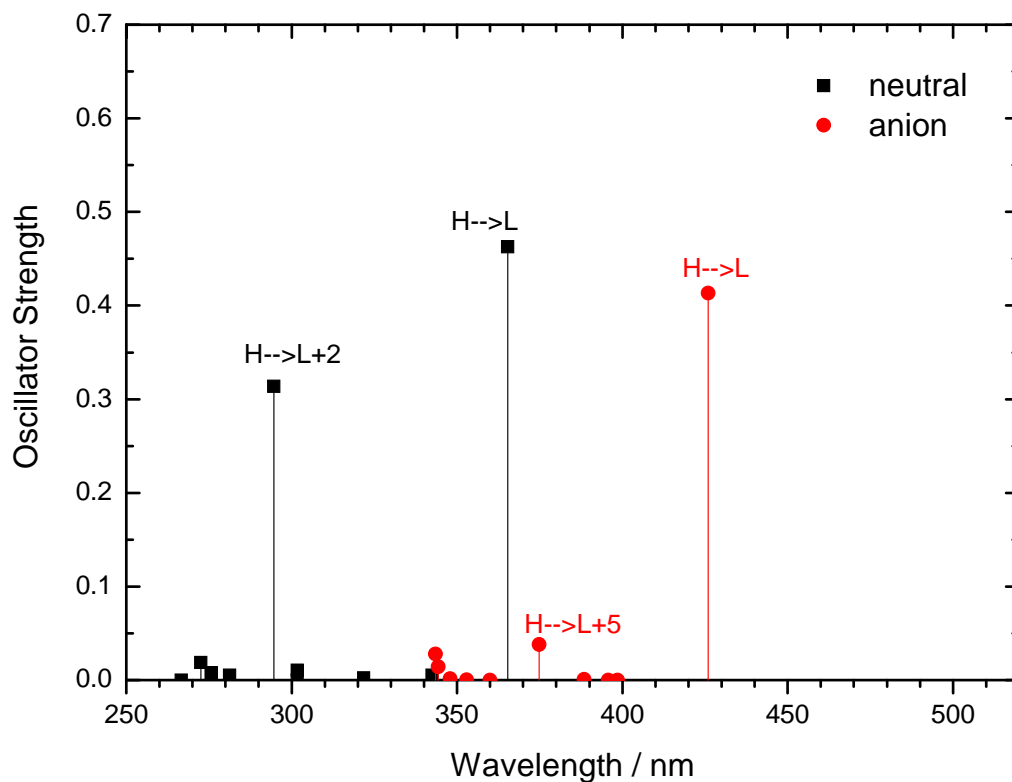

**Figure S8.** The oscillator strengths of neutral (black square) and anionic (red circle) species of **6** predicted using TDDFT method at the B3LYP/6-31G(d) level.

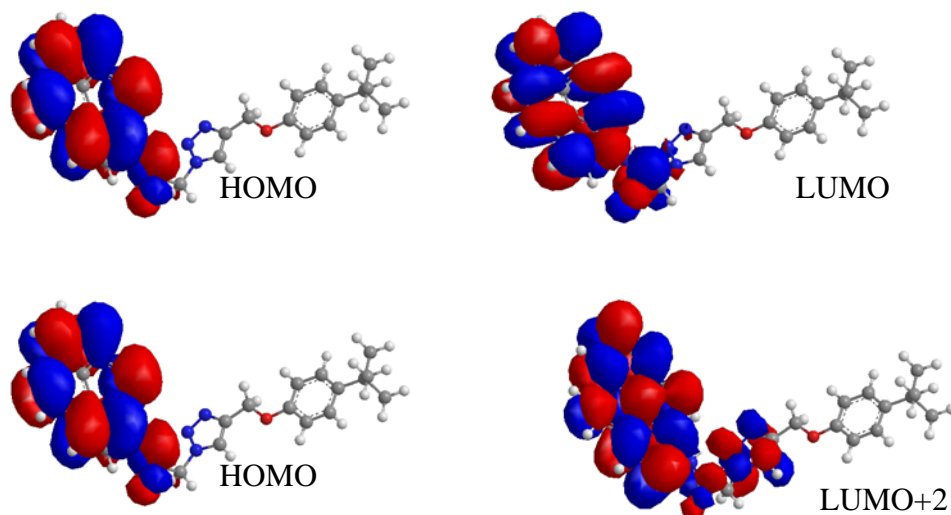

**Figure S9.** The molecular orbital of neutral-6 under B3LYP/6-31G\* calculation.

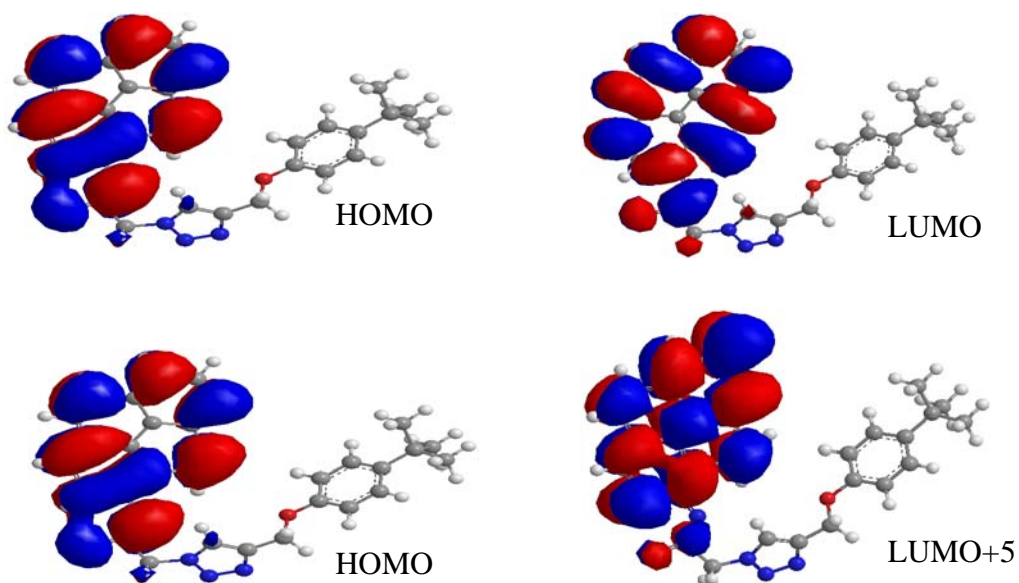

**Figure S10.** The molecular orbitals of anion-6 under B3LYP/6-31G\* calculation.

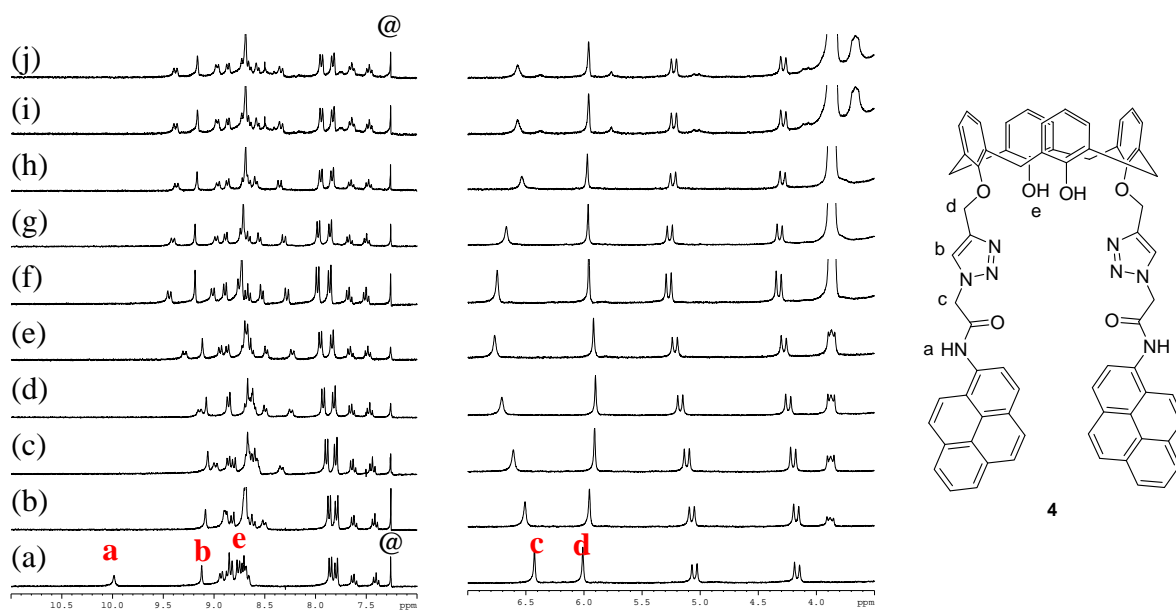

**Figure S11.** The  $^1\text{H}$  NMR (300 MHz) titration spectra of (a) **4** (5.0 mM) in  $\text{CD}_3\text{CN}$  at  $25^\circ\text{C}$  with the addition of various equiv of  $\text{F}^-$ : (b) 0.25, (c) 0.5, (d) 0.75, (e) 1.0, (f) 1.5, (g) 2.0, (h) 3.0, (i) 4.0, and (j) 5.0 equiv. Where signals denoted with @ came from external standard  $\text{CHCl}_3$ . The counter cation for fluoride is tetrabutylammonium ion.



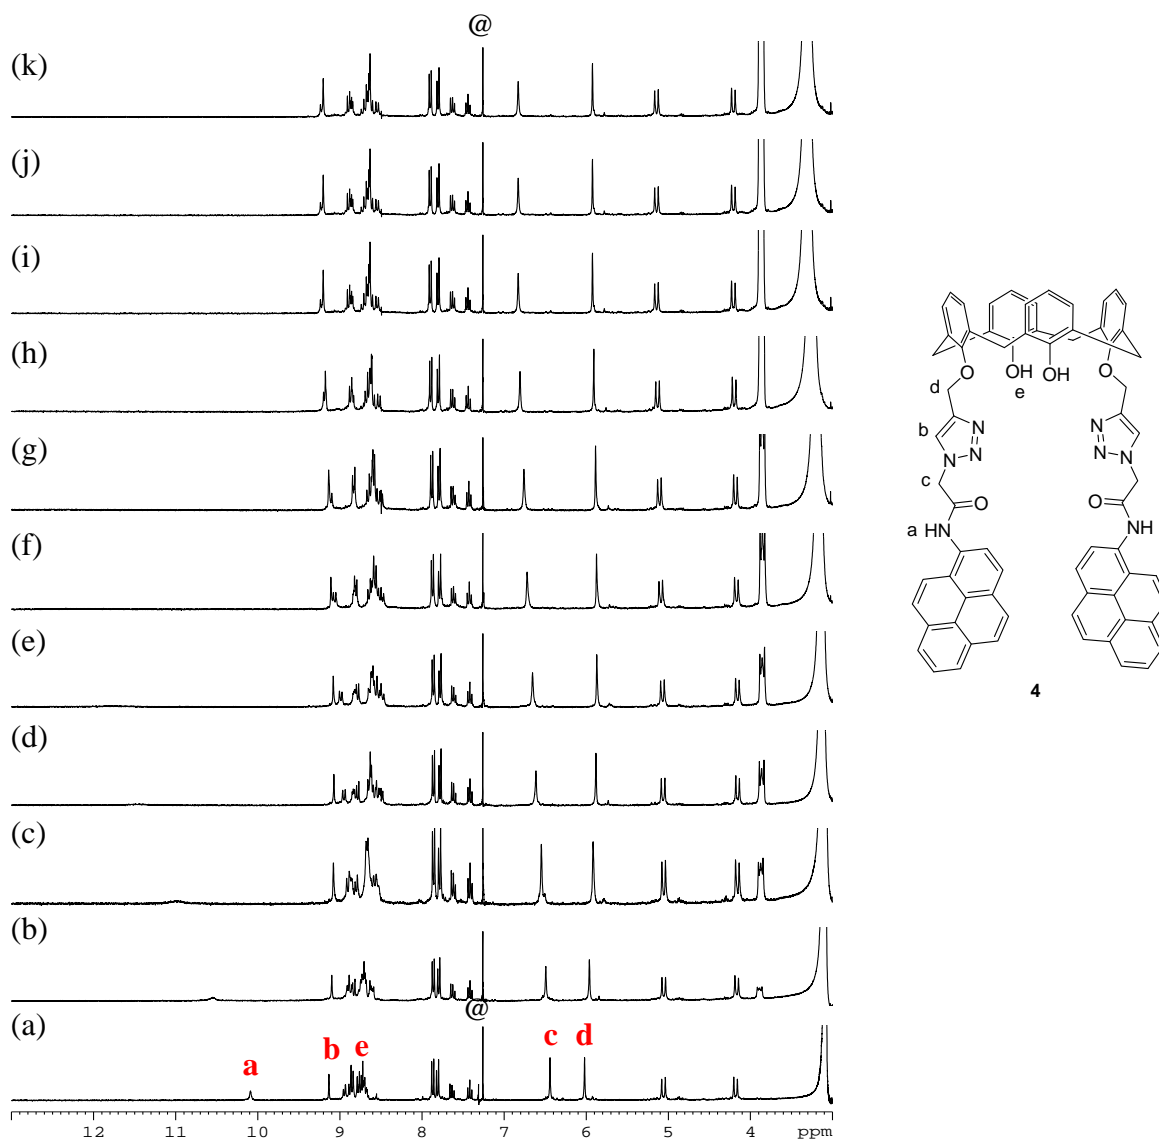

**Figure S12.** The  $^1\text{H}$  NMR (300 MHz) titration spectra of (a) **4** (5.0 mM) in  $\text{CD}_3\text{CN}$  at  $25^\circ\text{C}$  with the addition of various equiv of  $\text{H}_2\text{PO}_4^-$ : (b) 0.25, (c) 0.5, (d) 0.75, (e) 1.0, (f) 1.5, (g) 2.0, (h) 3.0, (i) 4.0, (j) 5.0 and (k) 10.0 equiv. Where signals denoted with @ came from external standard  $\text{CHCl}_3$ . The counter cation is tetrabutylammonium ion.

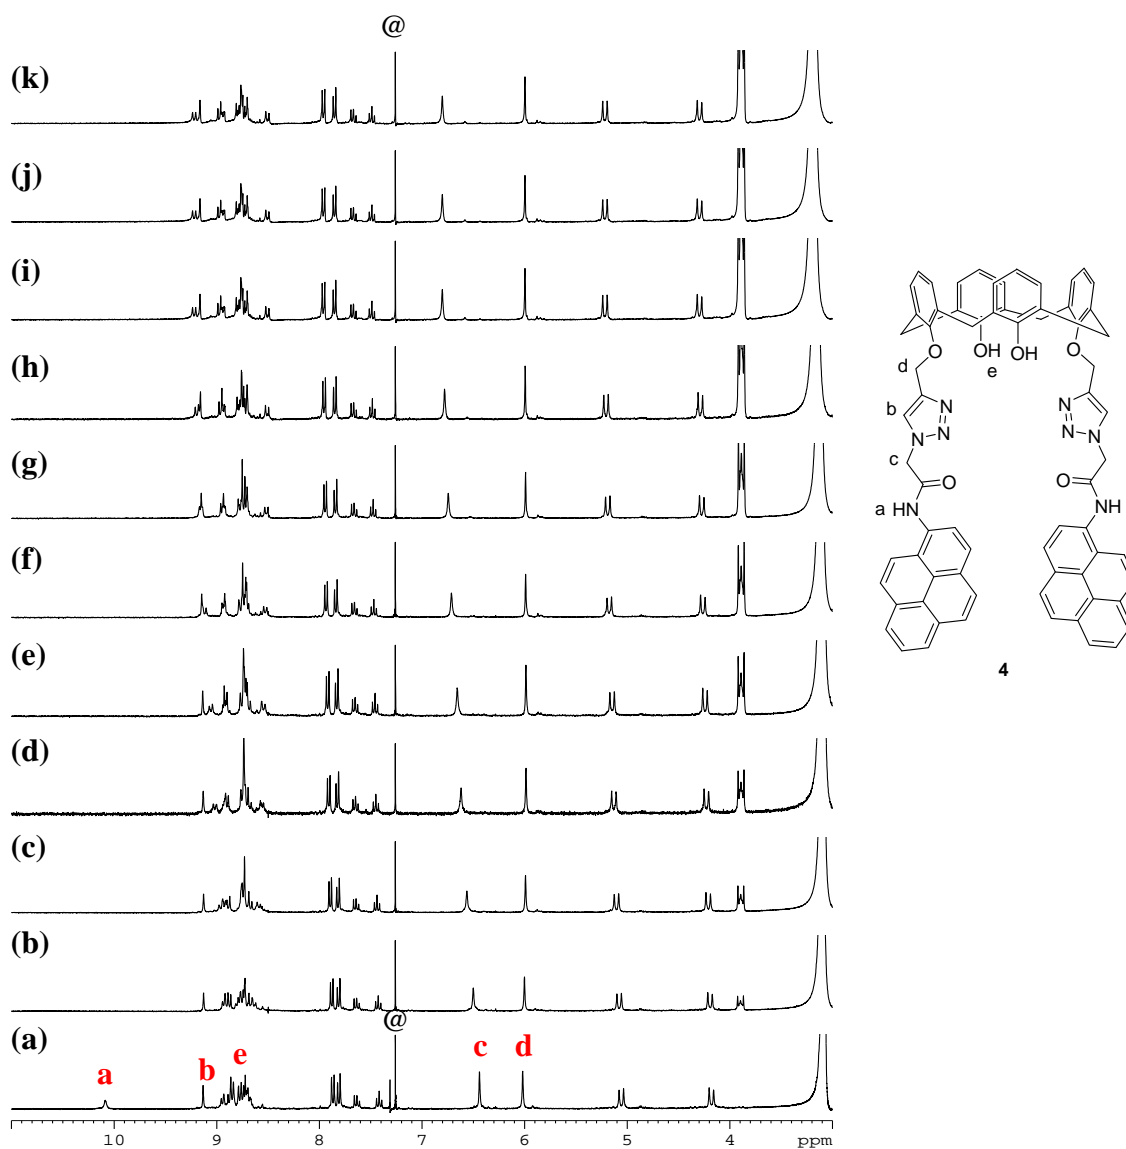

**Figure S13.** The  $^1\text{H}$  NMR (300 MHz) titration spectra of (a) **4** (5.0 mM) in  $\text{CD}_3\text{CN}$  at  $25^\circ\text{C}$  with the addition of various equiv of  $\text{OAc}^-$ : (b) 0.25, (c) 0.5, (d) 0.75, (e) 1.0, (f) 1.5, (g) 2.0, (h) 3.0, (i) 4.0, (j) 5.0, and (k) 10.0 equiv. Where signals denoted with @ came from external standard  $\text{CHCl}_3$ . The counter cation for acetate is tetrabutylammonium ion.

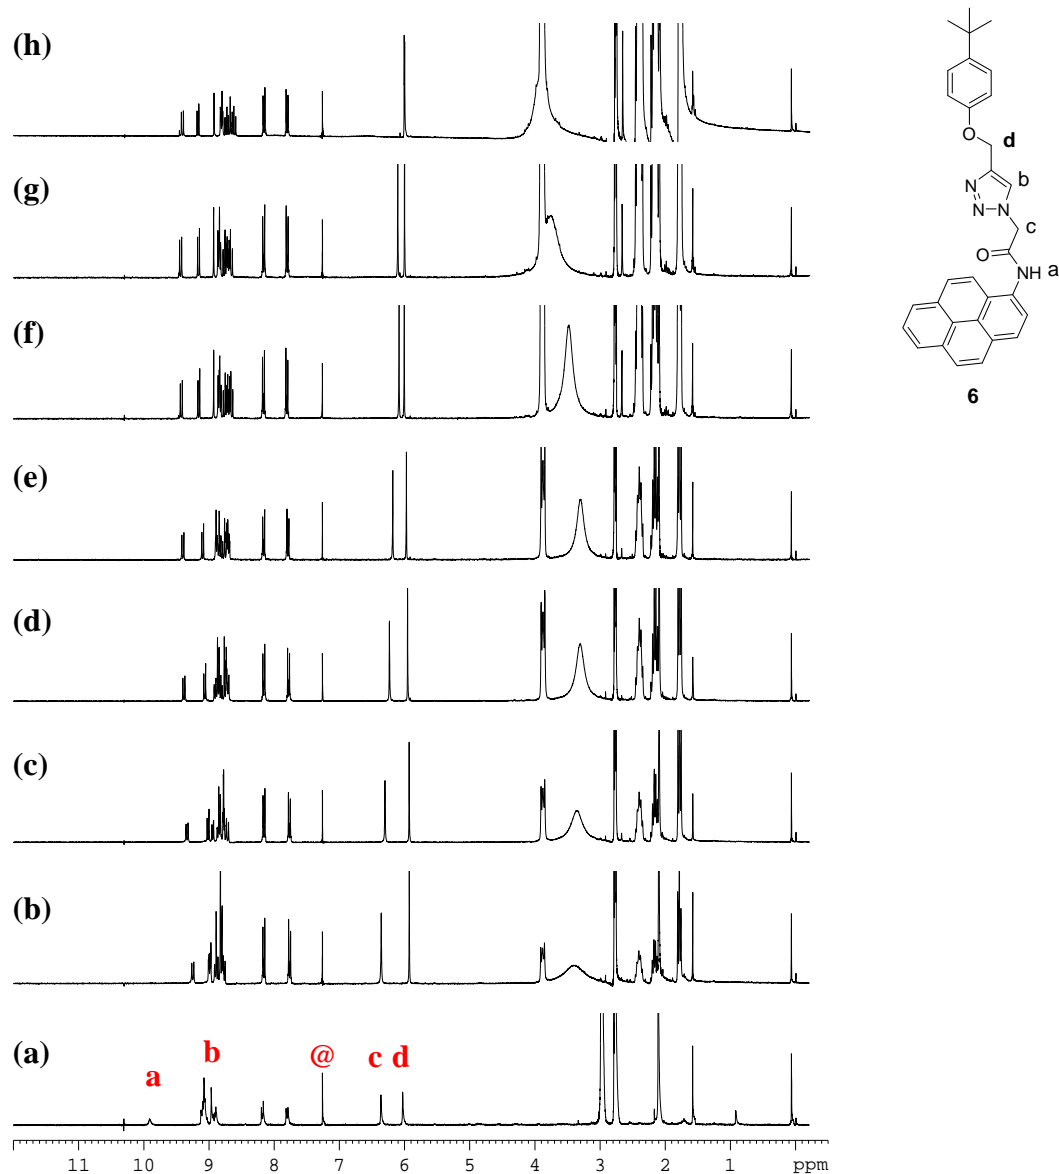

**Figure S14.** The  $^1\text{H}$  NMR (300 MHz) titration spectra of (a) **6** (5.0 mM) in  $\text{CD}_3\text{CN}$  at  $25^\circ\text{C}$  with the addition of various equiv of  $\text{F}^-$ : (b) 0.25, (c) 0.5, (d) 0.75, (e) 1.0, (f) 1.5, (g) 2.0, and (h) 3.0 equiv. Where signals denoted with @ came from external standard  $\text{CHCl}_3$ . The counter cation for fluoride is tetrabutylammonium ion.
